# Supplementary material for: Potential of Inactivated Bifidobacterium Strain in Attenuating Benzo(A)Pyrene Exposure-Induced Damage in Colon Epithelial Cells In Vitro
Source: PubMed Central journal article supplement (PMC7151743; doi:10.3390/toxics8010012), 2020-02-11
Supplement: toxics-08-00012-s001.pdf [file toxics-08-00012-s001.pdf]

# Potential of Inactivated *Bifidobacterium* Strain in Attenuating Benzo(A)Pyrene Exposure-Induced Damage in Colon Epithelial Cells In Vitro

Mengfan Xu, Lili Fu, Junwen Zhang, Tao Wang, Junfeng Fan, Baoqing Zhu, Piotr Dziugan, Bolin Zhang and Hongfei Zhao

**Table S1.** GO classification of DEGs between Control and BI-04 (Cell Component) .

| Gene Ontology Term                       | Cluster Frequency           | Corrected P-value |
|------------------------------------------|-----------------------------|-------------------|
| nucleus                                  | 93 out of 264 genes, 35.2%  | 0.00042           |
| intracellular membrane-bounded organelle | 182 out of 264 genes, 68.9% | 0.00863           |
| membrane-bounded organelle               | 189 out of 264 genes, 71.6% | 0.00997           |
| extracellular space                      | 10 out of 264 genes, 3.8%   | 0.03126           |
| mitotic cohesin complex                  | 2 out of 264 genes, 0.8%    | 0.04794           |

**Table S2.** GO classification of DEGs between Control and BI-04 (Biological Process) .

| Gene Ontology Term                                  | Cluster Frequency           | Corrected P-value |
|-----------------------------------------------------|-----------------------------|-------------------|
| RNA metabolic process                               | 94 out of 249 genes, 37.8%  | 0.00046           |
| organic cyclic compound metabolic process           | 118 out of 249 genes, 47.4% | 0.00198           |
| nucleic acid metabolic process                      | 101 out of 249 genes, 40.6% | 0.00226           |
| RNA biosynthetic process                            | 77 out of 249 genes, 30.9%  | 0.00305           |
| nucleobase-containing compound biosynthetic process | 81 out of 249 genes, 32.5%  | 0.00317           |
| organic cyclic compound biosynthetic process        | 83 out of 249 genes, 33.3%  | 0.00408           |
| aromatic compound biosynthetic process              | 81 out of 249 genes, 32.5%  | 0.00488           |
| cellular nitrogen compound biosynthetic process     | 82 out of 249 genes, 32.9%  | 0.00541           |
| heterocycle biosynthetic process                    | 81 out of 249 genes, 32.5%  | 0.00565           |
| nitrogen compound metabolic process                 | 122 out of 249 genes, 49.0% | 0.00658           |
| cellular aromatic compound metabolic process        | 112 out of 249 genes, 45.0% | 0.00955           |
| transcription, DNA-templated                        | 74 out of 249 genes, 29.7%  | 0.01589           |
| cellular nitrogen compound metabolic process        | 112 out of 249 genes, 45.0% | 0.02414           |
| nucleobase-containing compound metabolic process    | 107 out of 249 genes, 43.0% | 0.03089           |
| heterocycle metabolic process                       | 109 out of 249 genes, 43.8% | 0.0341            |

**Table S3.** The up-regulated genes and down-regulated genes in cell components between Control and BI-04.

| Up-regulated EDGs |                     | Down-regulated EDGs |                 |
|-------------------|---------------------|---------------------|-----------------|
| GO:0005615        | extracellular space | GO:0005794          | Golgi apparatus |
| GO:0005886        | plasma membrane     | GO:0005813          | centrosome      |
| GO:0000922        | spindle pole        | GO:0000139          | Golgi membrane  |

|            |                                    |            |                                              |
|------------|------------------------------------|------------|----------------------------------------------|
| GO:0000932 | cytoplasmic mRNA processing body   | GO:0005887 | integral component of plasma membrane        |
| GO:0001725 | stress fiber                       | GO:0030529 | intracellular ribonucleoprotein complex      |
| GO:0005578 | proteinaceous extracellular matrix | GO:0043232 | intracellular non-membrane-bounded organelle |
| GO:0005681 | spliceosomal complex               |            |                                              |
| GO:0005764 | lysosome                           |            |                                              |
| GO:0005777 | peroxisome                         |            |                                              |
| GO:0005787 | signal peptidase complex           |            |                                              |

**Table S4.** The up-regulated genes and down-regulated genes in biological process between Control and BI-04.

| Up-regulated EDGs |                                           | Down-regulated EDGs |                          |
|-------------------|-------------------------------------------|---------------------|--------------------------|
| GO:0001666        | response to hypoxia                       | GO:0007067          | mitotic nuclear division |
| GO:0006412        | translation                               | GO:0007154          | Cell communication       |
| GO:0009267        | cellular response to starvation           | GO:0015031          | protein transport        |
| GO:0009636        | response to toxic substance               | GO:0006468          | protein phosphorylation  |
| GO:0044093        | positive regulation of molecular function | GO:0007155          | cell adhesion            |
| GO:0000209        | protein polyubiquitination                |                     |                          |

**Table S5.** GO classification of DEGs between Control and BaP ( cell component ) .

| Gene Ontology term                           | Cluster frequency           | Corrected P-value |
|----------------------------------------------|-----------------------------|-------------------|
| cell                                         | 818 out of 905 genes, 90.4% | 1.21E-11          |
| cell part                                    | 818 out of 905 genes, 90.4% | 1.21E-11          |
| intracellular                                | 761 out of 905 genes, 84.1% | 7.77E-10          |
| intracellular part                           | 753 out of 905 genes, 83.2% | 9.92E-09          |
| nucleus                                      | 284 out of 905 genes, 31.4% | 1.67E-07          |
| cytoplasm                                    | 422 out of 905 genes, 46.6% | 2.36E-06          |
| endomembrane system                          | 177 out of 905 genes, 19.6% | 2.38E-06          |
| membrane-bounded organelle                   | 624 out of 905 genes, 69.0% | 2.62E-06          |
| organelle                                    | 671 out of 905 genes, 74.1% | 4.88E-06          |
| intracellular organelle                      | 651 out of 905 genes, 71.9% | 7.67E-06          |
| intracellular membrane-bounded organelle     | 595 out of 905 genes, 65.7% | 1.14E-05          |
| intracellular organelle part                 | 392 out of 905 genes, 43.3% | 0.00015           |
| cytoplasmic part                             | 375 out of 905 genes, 41.4% | 0.00021           |
| endoplasmic reticulum                        | 64 out of 905 genes, 7.1%   | 0.00026           |
| organelle part                               | 422 out of 905 genes, 46.6% | 0.00074           |
| cell junction                                | 56 out of 905 genes, 6.2%   | 0.0008            |
| non-membrane-bounded organelle               | 219 out of 905 genes, 24.2% | 0.00083           |
| intracellular non-membrane-bounded organelle | 219 out of 905 genes, 24.2% | 0.00083           |
| nuclear part                                 | 223 out of 905 genes, 24.6% | 0.00213           |

|                                |                             |         |
|--------------------------------|-----------------------------|---------|
| cytoskeletal part              | 84 out of 905 genes, 9.3%   | 0.00215 |
| cytoskeleton                   | 125 out of 905 genes, 13.8% | 0.0024  |
| membrane region                | 49 out of 905 genes, 5.4%   | 0.00266 |
| protein complex                | 196 out of 905 genes, 21.7% | 0.00305 |
| intracellular organelle lumen  | 211 out of 905 genes, 23.3% | 0.01002 |
| membrane-enclosed lumen        | 212 out of 905 genes, 23.4% | 0.0107  |
| organelle lumen                | 211 out of 905 genes, 23.3% | 0.01222 |
| cytosol                        | 65 out of 905 genes, 7.2%   | 0.01571 |
| Golgi apparatus                | 53 out of 905 genes, 5.9%   | 0.01996 |
| postsynaptic membrane          | 9 out of 905 genes, 1.0%    | 0.02136 |
| nuclear lumen                  | 199 out of 905 genes, 22.0% | 0.02563 |
| chromosome                     | 61 out of 905 genes, 6.7%   | 0.02663 |
| cell-cell junction             | 29 out of 905 genes, 3.2%   | 0.03436 |
| inclusion body                 | 9 out of 905 genes, 1.0%    | 0.03531 |
| centrosome                     | 24 out of 905 genes, 2.7%   | 0.03838 |
| microtubule cytoskeleton       | 77 out of 905 genes, 8.5%   | 0.03859 |
| bounding membrane of organelle | 78 out of 905 genes, 8.6%   | 0.04544 |

**Table S6.** GO classification of DEGs between Control and BaP (Molecular Function) .

| Gene Ontology term                                                            | Cluster frequency           | Corrected P-value |
|-------------------------------------------------------------------------------|-----------------------------|-------------------|
| binding                                                                       | 753 out of 849 genes, 88.7% | 2.81E-06          |
| protein binding                                                               | 392 out of 849 genes, 46.2% | 0.00022           |
| ion binding                                                                   | 321 out of 849 genes, 37.8% | 0.00111           |
| enzyme binding                                                                | 98 out of 849 genes, 11.5%  | 0.00165           |
| zinc ion binding                                                              | 49 out of 849 genes, 5.8%   | 0.00398           |
| metal ion binding                                                             | 227 out of 849 genes, 26.7% | 0.00444           |
| DNA binding                                                                   | 107 out of 849 genes, 12.6% | 0.00481           |
| sequence-specific DNA binding RNA polymerase II transcription factor activity | 31 out of 849 genes, 3.7%   | 0.01864           |
| sequence-specific DNA binding transcription factor activity                   | 45 out of 849 genes, 5.3%   | 0.01921           |
| transition metal ion binding                                                  | 156 out of 849 genes, 18.4% | 0.0249            |
| mannosyl-oligosaccharide mannosidase activity                                 | 5 out of 849 genes, 0.6%    | 0.03075           |
| protein heterodimerization activity                                           | 14 out of 849 genes, 1.6%   | 0.03937           |
| anion binding                                                                 | 87 out of 849 genes, 10.2%  | 0.04402           |

**Table S7.** GO classification of DEGs between Control and BaP (Biological Process) .

| Gene Ontology term                                             | Cluster frequency           | Corrected P-value |
|----------------------------------------------------------------|-----------------------------|-------------------|
| nervous system development                                     | 131 out of 861 genes, 15.2% | 2.02E-06          |
| regulation of cellular macromolecule biosynthetic process      | 113 out of 861 genes, 13.1% | 1.22E-05          |
| multicellular organismal development                           | 265 out of 861 genes, 30.8% | 1.93E-05          |
| regulation of transcription, DNA-templated                     | 104 out of 861 genes, 12.1% | 2.46E-05          |
| regulation of nitrogen compound metabolic process              | 140 out of 861 genes, 16.3% | 3.49E-05          |
| regulation of nucleobase-containing compound metabolic process | 138 out of 861 genes, 16.0% | 3.93E-05          |
| cardiovascular system development                              | 68 out of 861 genes, 7.9%   | 4.38E-05          |

|                                                   |                             |          |
|---------------------------------------------------|-----------------------------|----------|
| circulatory system development                    | 68 out of 861 genes, 7.9%   | 4.38E-05 |
| system development                                | 241 out of 861 genes, 28.0% | 5.03E-05 |
| single-organism developmental process             | 305 out of 861 genes, 35.4% | 8.00E-05 |
| regulation of RNA biosynthetic process            | 105 out of 861 genes, 12.2% | 9.04E-05 |
| anatomical structure development                  | 278 out of 861 genes, 32.3% | 0.00015  |
| regulation of RNA metabolic process               | 106 out of 861 genes, 12.3% | 0.00015  |
| regulation of macromolecule biosynthetic process  | 121 out of 861 genes, 14.1% | 0.00016  |
| regulation of biosynthetic process                | 127 out of 861 genes, 14.8% | 0.00027  |
| positive regulation of cellular process           | 163 out of 861 genes, 18.9% | 0.00031  |
| cell differentiation                              | 175 out of 861 genes, 20.3% | 0.00047  |
| organic substance biosynthetic process            | 311 out of 861 genes, 36.1% | 0.00056  |
| regulation of cellular biosynthetic process       | 119 out of 861 genes, 13.8% | 0.00063  |
| neuron differentiation                            | 65 out of 861 genes, 7.5%   | 0.00064  |
| biosynthetic process                              | 315 out of 861 genes, 36.6% | 0.00088  |
| macromolecule biosynthetic process                | 273 out of 861 genes, 31.7% | 0.00091  |
| regulation of cellular metabolic process          | 200 out of 861 genes, 23.2% | 0.00098  |
| cell development                                  | 86 out of 861 genes, 10.0%  | 0.00104  |
| primary metabolic process                         | 543 out of 861 genes, 63.1% | 0.00134  |
| positive regulation of cellular metabolic process | 97 out of 861 genes, 11.3%  | 0.00153  |
| cellular macromolecule biosynthetic process       | 268 out of 861 genes, 31.1% | 0.00154  |
| negative regulation of cell differentiation       | 34 out of 861 genes, 3.9%   | 0.00155  |
| response to endogenous stimulus                   | 87 out of 861 genes, 10.1%  | 0.00176  |
| positive regulation of metabolic process          | 106 out of 861 genes, 12.3% | 0.00184  |
| anatomical structure morphogenesis                | 143 out of 861 genes, 16.6% | 0.00197  |
| transcription, DNA-templated                      | 216 out of 861 genes, 25.1% | 0.002    |
| generation of neurons                             | 78 out of 861 genes, 9.1%   | 0.00244  |
| negative regulation of developmental process      | 38 out of 861 genes, 4.4%   | 0.00271  |
| RNA biosynthetic process                          | 217 out of 861 genes, 25.2% | 0.00275  |
| regulation of primary metabolic process           | 189 out of 861 genes, 22.0% | 0.00304  |
| cellular biosynthetic process                     | 301 out of 861 genes, 35.0% | 0.00325  |
| cellular macromolecule metabolic process          | 415 out of 861 genes, 48.2% | 0.00345  |
| single-multicellular organism process             | 332 out of 861 genes, 38.6% | 0.00355  |
| regulation of metabolic process (view genes)      | 230 out of 861 genes, 26.7% | 0.00415  |
| neurogenesis                                      | 81 out of 861 genes, 9.4%   | 0.00432  |
| developmental process                             | 317 out of 861 genes, 36.8% | 0.00433  |
| cellular developmental process                    | 194 out of 861 genes, 22.5% | 0.00472  |
| regulation of cell differentiation                | 63 out of 861 genes, 7.3%   | 0.0052   |
| protein modification process                      | 171 out of 861 genes, 19.9% | 0.00613  |
| cell cycle                                        | 110 out of 861 genes, 12.8% | 0.0065   |
| organic substance metabolic process               | 559 out of 861 genes, 64.9% | 0.00685  |
| macromolecule modification                        | 177 out of 861 genes, 20.6% | 0.00894  |
| cellular protein modification process             | 168 out of 861 genes, 19.5% | 0.00974  |
| regulation of macromolecule metabolic process     | 182 out of 861 genes, 21.1% | 0.01018  |
| organic cyclic compound biosynthetic process      | 234 out of 861 genes, 27.2% | 0.01179  |
| negative regulation of cellular process           | 132 out of 861 genes, 15.3% | 0.01228  |
| positive regulation of gene expression            | 41 out of 861 genes, 4.8%   | 0.01263  |

|                                                                         |                             |         |
|-------------------------------------------------------------------------|-----------------------------|---------|
| positive regulation of nitrogen compound metabolic process              | 47 out of 861 genes, 5.5%   | 0.01325 |
| cellular component organization                                         | 266 out of 861 genes, 30.9% | 0.01638 |
| cell cycle process                                                      | 96 out of 861 genes, 11.1%  | 0.01677 |
| positive regulation of biological process                               | 182 out of 861 genes, 21.1% | 0.01906 |
| positive regulation of nucleobase-containing compound metabolic process | 46 out of 861 genes, 5.3%   | 0.01986 |
| vasculature development                                                 | 44 out of 861 genes, 5.1%   | 0.02144 |
| positive regulation of transcription, DNA-templated                     | 38 out of 861 genes, 4.4%   | 0.02295 |
| cellular component morphogenesis                                        | 62 out of 861 genes, 7.2%   | 0.02363 |
| positive regulation of macromolecule metabolic process                  | 88 out of 861 genes, 10.2%  | 0.02569 |
| regulation of transcription from RNA polymerase II promoter             | 51 out of 861 genes, 5.9%   | 0.0279  |
| cellular component organization or biogenesis                           | 272 out of 861 genes, 31.6% | 0.02807 |
| cellular metabolic process                                              | 526 out of 861 genes, 61.1% | 0.02819 |
| nucleic acid metabolic process                                          | 287 out of 861 genes, 33.3% | 0.02979 |
| positive regulation of RNA biosynthetic process                         | 38 out of 861 genes, 4.4%   | 0.0386  |
| nucleobase-containing compound biosynthetic process                     | 223 out of 861 genes, 25.9% | 0.04117 |
| aromatic compound biosynthetic process                                  | 225 out of 861 genes, 26.1% | 0.04186 |
| axon guidance                                                           | 18 out of 861 genes, 2.1%   | 0.04192 |
| neuron projection guidance                                              | 18 out of 861 genes, 2.1%   | 0.04192 |

**Table S8.** The up-regulated genes and down-regulated genes in cell components between Control and BaP.

| Up-regulated EDGs |                                       | Down-regulated EDGs |                             |
|-------------------|---------------------------------------|---------------------|-----------------------------|
| GO:0000932        | cytoplasmic mRNA processing body      | GO:0005813          | centrosome                  |
| GO:0005669        | transcription factor TFIID complex    | GO:0005794          | Golgi apparatus             |
| GO:0005776        | autophagosome                         | GO:0097060          | synaptic membrane           |
| GO:0005844        | polysome                              | GO:0030054          | cell junction               |
| GO:0005849        | mRNA cleavage factor complex          | GO:0005764          | lysosome                    |
| GO:0005891        | voltage-gated calcium channel complex | GO:0005769          | early endosome              |
| GO:0031074        | nucleocytoplasmic shuttling complex   | GO:0016323          | basolateral plasma membrane |
| GO:0031201        | SNARE complex                         | GO:0031965          | nuclear membrane            |
| GO:0031225        | anchored component of membrane        |                     |                             |
| GO:0034704        | calcium channel complex               |                     |                             |

**Table S9.** The up-regulated genes and down-regulated genes in molecular function between Control and BaP.

| Up-regulated EDGs | Down-regulated EDGs |
|-------------------|---------------------|
|-------------------|---------------------|

|            |                                             |            |                              |
|------------|---------------------------------------------|------------|------------------------------|
| GO:0016209 | antioxidant activity                        | GO:0008092 | cytoskeletal protein binding |
| GO:0003729 | mRNA binding                                | GO:0005543 | phospholipid binding         |
| GO:000495  | dopamine neurotransmitter receptor activity | GO:0017016 | Ras GTPase binding           |
| GO:0008106 | alcohol dehydrogenase (NADP+) activity      | GO:0003774 | motor activity               |
| GO:0008408 | 3'-5' exonuclease activity                  | GO:0005509 | calcium ion binding          |
| GO:0009055 | electron carrier activity                   | GO:0005539 | glycosaminoglycan binding    |
| GO:0003684 | damaged DNA binding                         | GO:0000287 | magnesium ion binding        |
| GO:0005035 | death receptor activity                     |            |                              |

**Table S10.** The up-regulated genes and down-regulated genes in biological process between Control and BaP.

| Up-regulated EDGs |                                                                           | Down-regulated EDGs |                                           |
|-------------------|---------------------------------------------------------------------------|---------------------|-------------------------------------------|
| GO:0001523        | retinoid metabolic process                                                | GO:0007599          | hemostasis                                |
| GO:0007189        | adenylate cyclase-activating G-protein coupled receptor signaling pathway | GO:0007067          | mitotic nuclear division                  |
| GO:0009267        | cellular response to starvation                                           | GO:0019538          | protein metabolic process                 |
| GO:0009812        | flavonoid metabolic process                                               | GO:0000087          | mitotic M phase                           |
| GO:0030647        | aminoglycoside antibiotic metabolic process                               | GO:0006886          | intracellular protein transport           |
| GO:0000060        | protein import into nucleus, translocation                                | GO:0019827          | stem cell population maintenance          |
| GO:0048167        | regulation of synaptic plasticity                                         | GO:0006928          | movement of cell or subcellular component |
| GO:0006304        | DNA modification                                                          | GO:0016337          | single organismal cell-cell adhesion      |
| GO:0009753        | response to jasmonic acid                                                 | GO:0040007          | growth                                    |
| GO:0072331        | signal transduction by p53 class mediator                                 | GO:0001935          | endothelial cell proliferation            |

**Table S11.** GO classification of DEGs between BaP and BI-04+BaP (Cell Component) .

| Gene Ontology term | Cluster frequency         | Corrected P-value |
|--------------------|---------------------------|-------------------|
| nucleus            | 28 out of 62 genes, 45.2% | 0.00686           |
| nucleoplasm        | 11 out of 62 genes, 17.7% | 0.02477           |

**Table S12.** GO classification of DEGs between BaP and BI-04+BaP (Molecular Function) .

| Gene Ontology term | Cluster frequency | Corrected P-value |
|--------------------|-------------------|-------------------|
|--------------------|-------------------|-------------------|

|                  |                           |         |
|------------------|---------------------------|---------|
| metal ion bindin | 24 out of 57 genes, 42.1% | 0.01861 |
| ion binding      | 30 out of 57 genes, 52.6% | 0.03843 |

**Table 13.** GO classification of DEGs between BaP and BI-04+BaP (Biological Process) .

| Gene Ontology term                           | Cluster frequency         | Corrected P-value |
|----------------------------------------------|---------------------------|-------------------|
| cellular macromolecule metabolic process     | 38 out of 54 genes, 70.4% | 0.00381           |
| macromolecule metabolic process              | 41 out of 54 genes, 75.9% | 0.00484           |
| cellular metabolic process                   | 44 out of 54 genes, 81.5% | 0.0108            |
| nitrogen compound metabolic process          | 34 out of 54 genes, 63.0% | 0.01454           |
| metabolic process                            | 47 out of 54 genes, 87.0% | 0.01676           |
| primary metabolic process                    | 44 out of 54 genes, 81.5% | 0.0192            |
| organic substance metabolic process          | 45 out of 54 genes, 83.3% | 0.02231           |
| organic cyclic compound metabolic process    | 32 out of 54 genes, 59.3% | 0.03169           |
| heterocycle metabolic process                | 31 out of 54 genes, 57.4% | 0.03385           |
| nucleic acid metabolic process               | 28 out of 54 genes, 51.9% | 0.04035           |
| cellular aromatic compound metabolic process | 31 out of 54 genes, 57.4% | 0.0411            |

**Table S14.** The up-regulated genes and down-regulated genes in cell components between BaP and BI-04+BaP.

| Up-regulated EDGs |                      | Down-regulated EDGs |                                              |
|-------------------|----------------------|---------------------|----------------------------------------------|
| GO:0016020        | membrane             |                     | mitochondrial proton-transporting            |
| GO:0005681        | spliceosomal complex | GO:0000276          | ATP synthase complex, coupling factor F(o)   |
| GO:0000812        | Swr1 complex         | GO:0000139          | Golgi membrane                               |
|                   |                      | GO:0000777          | condensed chromosome kinetochore             |
|                   |                      | GO:0005769          | early endosome                               |
|                   |                      | GO:0030529          | intracellular ribonucleoprotein complex      |
|                   |                      | GO:0043232          | intracellular non-membrane-bounded organelle |
|                   |                      | GO:0019866          | organelle inner membrane                     |

**Table S15.** The up-regulated genes and down-regulated genes in molecular function between BaP and BI-04+BaP.

| Up-regulated EDGs |                                                    | Down-regulated EDGs |                                          |
|-------------------|----------------------------------------------------|---------------------|------------------------------------------|
| GO:0008270        | zinc ion binding                                   | GO:0004623          | phospholipase A2 activity protein        |
| GO:0016859        | cis-trans isomerase activity                       | GO:0004661          | geranylgeranyltransferase activity       |
| GO:0019904        | protein domain specific binding                    | GO:0005506          | iron ion binding                         |
| GO:0042802        | identical protein binding                          | GO:0043168          | phospholipid binding                     |
| GO:0001071        | nucleic acid binding transcription factor activity | GO:0008135          | translation factor activity, RNA binding |
| GO:0003824        | catalytic activity                                 | GO:0008417          | fucosyltransferase activity              |
| GO:0019900        | kinase binding                                     | GO:0008757          |                                          |

|            |                               |            |                                                           |
|------------|-------------------------------|------------|-----------------------------------------------------------|
| GO:0032550 | purine ribonucleoside binding |            | S-adenosylmethionine-dependent methyltransferase activity |
| GO:0036094 | small molecule binding        | GO:0016702 | oxidoreductase activity                                   |
|            |                               | GO:0016811 | hydrolase activity                                        |

**Table S16.** The up-regulated genes and down-regulated genes in biological process between BaP and BI-04+BaP.

| Up-regulated EDGs |                                                                      | Down-regulated EDGs |                                                 |
|-------------------|----------------------------------------------------------------------|---------------------|-------------------------------------------------|
| GO:0006355        | regulation of transcription, DNA-templated                           | GO:0000723          | telomere maintenance                            |
| GO:0006366        | transcription from RNA polymerase II promoter                        | GO:0001501          | skeletal system development                     |
| GO:0006915        | apoptotic process                                                    | GO:0001558          | regulation of cell growth                       |
| GO:0000377        | RNA splicing                                                         | GO:0006468          | protein phosphorylation                         |
| GO:0008283        | cell proliferation                                                   | GO:0007155          | cell adhesion                                   |
| GO:0000122        | negative regulation of transcription from RNA polymerase II promoter | GO:0001666          | response to hypoxia                             |
|                   |                                                                      | GO:0001676          | long-chain fatty acid metabolic process         |
|                   |                                                                      | GO:0002761          | regulation of myeloid leukocyte differentiation |
|                   |                                                                      | GO:0006658          | phosphatidylserine metabolic process            |
|                   |                                                                      | GO:0006952          | defense response                                |
